# Supplementary material
Source: publisher figshare collection journal article supplement (https://f1000.figshare.com/articles/dataset/_/1476156)
Supplement: Supplementary file 1 [file 1]

## Sheet: time
time dependance
number of the experiment	F508del-CFTR	band c	band b	C/C+B
1		19676.1	35623.5	0.355809
2		2201.96	5040.1	0.304052	Mean	0.257904
3		6685.85	15274.6	0.30445	SD	0.0656421
4		5166.15	12890.2	0.286114
5		2335.76	7737.19	0.231884
6		1893.83	7997.05	0.191473
7		1800	9200	0.16
8		1155.68	3881	0.229452
	F508del-CFTR 10' TNF	band c	band b	C/C+B
1		59859.6	33293.7	0.556197	Mean	0.509328
2		30179.4	34330.4	0.532174	SD	0.0712051
3		8609.48	6191.07	0.5817
4		8869.28	13036	0.404893
5		8950.02	10024.9	0.471677
	F508del-CFTR 3hTNF	band c	band b	C/(c+b)
1	delf 3h	34021.8	62880.7	0.541053	Mean	0.50163
2	delf 3h	4304.48	8738.31	0.330027	SD	0.104423
3	delf 3h	8250	8950.02	0.479651
4	delf 3h	38452.5	29301	0.567535
5		6266.19	4356.61	0.589881
	F508del-CFTR 24h TNF	band c	band b	c/(b+c)
1	delf 24h	12458	14219	0.466994	Mean	0.36347
2	delf 24h	17185.2	50828.2	0.338104	SD	0.0934595
3	delf 24h	5721.31	14331.5	0.285312

## Sheet: concentration
concentration dependance
F508del-CFTR	C	B	C/C+B
1	2335.76	7737.19	0.231884	Mean	0.203202
2	1893.83	7997.05	0.191473	SD	0.0342332
3	1800	9200	0.16
4	1155.68	3881	0.229452
F508del-CFTR + 0.5 ng/ml TNF	C	B	C/C+B	Mean	0.409744
1	7763.98	7360.13	0.513351	SD	0.133209
2	2560	7300	0.259483
3	11049	13160.2	0.456396
F508del-CFTR + 10 ng/ml TNF	C	B	C/C+B
1	5930.35	7453.91	0.443084	Mean	0.371463
2	1772	4700	0.273795	SD	0.0756262
3	2657.25	4898.23	0.351699
4	23604.4	32963.7	0.417274
F508del-CFTR 50	C	B	C/C+B
1	4935.89	5644.45	0.466515	Mean	0.456498
2	2984.74	6600	0.31	SD	0.118388
3	2600	3148.26	0.45
4	33116.6	22125.9	0.599477
											delf 0,5	1824.3	8195.71	0.182065
												delf 10

## Sheet: k8-cftr
		proximity ligation assay K8-CFTR
			number of dots	number of cells/ slides	Mean	SD
		F508del-CFTR	1174	8	146.75
		F508del-CFTR	847	6	141.167
		F508del-CFTR	1066	8	133.25
				average	140.389	6.78352
		F508Del-cftr+ 30' tnf	450	4	112.5
		F508Del-cftr+ 30' tnf	653	5	130.6
		F508Del-cftr+ 30' tnf	536	6	89.3333
		F508Del-cftr+ 30' tnf	1066	8	133.25
				average	116.421	20.2762
		F508Del-cftr+ 3h tnf	863	6	143.833
		F508Del-cftr+ 3h tnf	1430	8	178.75
		F508Del-cftr+ 3h tnf	1288	8	161
				average	161.194	17.4591

## Sheet: k8-NHERF
proximity ligation assay K8-NHERF
		Hela WT CFTR-NHERF1						Hela DelF CFTR-NHERF1
		Nb cellS	Nb dots	Nb dot/Nb cell				Nb cellS	Nb dots	Nb dot/Nb cell
		12	637	53.0833				13	440	33.8462
		15	515	34.3333	SD	12.6277		9	375	41.6667
		18	523	29.0556	means	38.8241		8	384	48	SD	6.29169
	total	45	1675	37.2				10	461	46.1	Means	42.4032
							total	40	1660	41.5
		Hela WT+ TNF 30 min CFTR-NHERF1						Hela DelF+ TNF 30 min CFTR-NHERF1
		Nb cells	Nb dots	Nb dot/Nb cell				Nb cellS	Nb dots	Nb dot/Nb cell
		16	500	31.25				8	360	45
		11	354	32.1818				11	356	32.3636
		9	396	44	SD	7.69167		11	284	25.8182
		21	540	25.7143	means	33.2865		5	166	33.2	SD	7.09624
	total	57	1790	31.4				18	678	37.6667	Means	34.8097
							total	53	1844	34.8
		Hela WT+ TNF 3h CFTR-NHERF1
		Nb cells	Nb dots	Nb dot/Nb cell
		4	234	58.5				Hela DelF+ TNF 3h CFTR-NHERF1
		13	646	49.6923				Nb cellS	Nb dots	Nb dot/Nb cell
		13	534	41.0769				3	403	134.333
		6	262	43.6667	SD	9.80831		7	343	49
		4	257	64.25	means	51.4372		9	340	37.7778
	total	40	1933	48.3				12	537	44.75	SD	8.28546
								21	632	30.0952	Means	40.4058
							total	52	2255	43.4
				means	SD	means	SD
				WT	WT	DelF	DelF
			control	38.82	12.63	42.4	6.29
			TNF30 min	33.29	7.69	34.81	7.1
			TNF 3h	51.44	9.81	40.41	8.29
